# Supplementary material for: Sociodemographic profile of metabolic syndrome in patients treated with antipsychotic drugs: A tertiary hospital-based cross-sectional study from the eastern region of Nepal
Source: Research Square preprint supplement (doi:10.21203/rs.3.rs-6249457/v1), 2025-04-23
Supplement: Supplementary file 1 [file 70d096a51dd27b2a1e8b40e2.docx]

Supplementary Information

| **Supplemental Table 1 Group of common foods consumed by the Nepali population** | | |
| --- | --- | --- |
| **S.N.** | **Food groups** | **Food items** |
|  | Whole grain foods | Rice, Wheat grain bread (Roti), Maize or Millet Bread or Dhido, Barley |
|  | Breakfast foods | Pau roti (bakery bread), Mo: Mo, Chowmein, Noodles, Chau-Chau, Thukpa, Pasta, Macaroni, Idali, Yomari, etc |
|  | Pulses | Lentils, Bengal Gram, Beans, Peas, Kidney Beans, Black Beans, Chickpeas, Pigeon Peas, etc. |
|  | Vegetables | Green leafy vegetables or vegetables of sprouted seeds, salad etc. |
|  | Tuberous roots | Boiled potato, Potato Receipt, potato containing vegetables, Sweet Potato, Yam (Tarul), etc. |
|  | Fresh fruits or juices | Mango, Apple, Orange, Guava, Papaya, Kiwi, Avogadro, Banana, Grape, Pears, Fruit juice etc. |
|  | Nuts and seeds | Cashew Nuts, Raisins, Ground Nuts (Badam), Almond, Walnuts, Dates, Pistachios, etc. |
|  | Milk, Curd, Yogurt | Milk, Curd, Yogurt, Lassi, etc. |
|  | Ghee, butter | Ghee, Ghee contains foods, Butter (Nauni, Chhali, Madani, Malai), etc. |
|  | Other dairy products | Paneer, Cheese, Tofu etc. |
|  | Cream containing foods | Donuts, Cake, cupcakes, Pastry Cake, Ice Cream, etc. |
|  | Fast foods | Burgers, Pizza, Sandwich, Katti Rolls, Chatamari, etc |
|  | Fried foods | Samosas, Pakauda, Puri, Parathas, Chole Bhature, Dosa, Pastry, Kachori, Chaat, Sel Roti, etc. |
|  | Cookies | Biscuits, cookies, Khajuri, etc |
|  | High-salty foods | Namkeen, Bhujia, Pickles, Papad, Dalmoth, chips, Kraker, Kurkure, Chutney, etc. |
|  | Tea, Coffee | Tea, Coffee, cold coffee, etc. |
|  | Carbonated beverages | Soft Drinks Such as Coca-Cola, Fanta, Sprite, Dew, Pepsi, etc. |
|  | Sweets, Desserts | Laddu, Barfi, Jeri, Chocolate, Halwa, Rice pudding, Caster, etc. |
|  | Animal meats | Mutton, Pig, Buff meats, etc. |
|  | Chicken | Chicken meat |
|  | Fish | Any fishes |
|  | Whole egg | Whole-boiled egg, omelette or poached, etc. |
|  | Miscellaneous addition | Jam, Jeli, ketchup, Sauces, mayonnaise, etc. |
| Note: All patients prepared their food items at home using various oils, such as mustard, sunflower, and soybean oil, while they avoided animal fats, lard, and vegetable oils like Dalda. | | |

| **Supplemental Table 2 Food frequencies and their association with MetS among overall and sex of the patients** | | | | | | | | | | | | |
| --- | --- | --- | --- | --- | --- | --- | --- | --- | --- | --- | --- | --- |
| **Eating frequency** | **Overall patients (n= 286)** | | | | **Male patients (n= 140)** | | | | **Female patients (n= 146)** | | | |
| **Total**  **n= 286** | **With MetS**  **n= 150** | **Without MetS**  **n= 136** | **χ2 P value** | **Total**  **n= 140** | **With MetS**  **n= 71** | **Without MetS**  **n= 69** | **χ2 P value** | **Total**  **n= 146** | **With MetS**  **n= 79** | **Without MetS**  **n= 67** | **χ2 P value** |
| **Whole grain Meal intake** |  |  |  |  |  |  |  |  |  |  |  |  |
| 1-2 times  3-4 times  ≥ 5 times | 114 (39.9%)  77 (26.9%)  95 (33.2%) | 30 (20.0%)  43 (28.7%)  77 (51.3%) | 84 (61.8%)  34 (25.0%)  18 (13.2%) | **<0.001** | 58 (41.4%)  38 (27.1%)  44 (31.4%) | 15 (21.1%)  20 (28.2%)  36 (50.7%) | 43 (62.3%)  18 (26.1%)  8 (11.6%) | **<0.001** | 56 (38.4%)  39 (26.7%)  51 (34.9%) | 15 (19.0%)  23 (29.1%)  41 (51.9%) | 41 (61.2%)  16 (23.9%)  10 (14.9%) | **<0.001** |
| **Self-perception about meal intake** |  |  |  |  |  |  |  |  |  |  |  |  |
| I ate as usual  I ate more than usual  I ate less than usual | 118 (41.3%)  115(40.2%)  53 (18.5%) | 52 (34.7%)  82 (54.7%)  16 (10.7%) | 66 (48.5%)  33 (24.3%)  37 (27.2%) | **<0.001** | 70 (50.0%)  45 (32.1%)  25 (17.9%) | 30 (42.3%)  32 (45.1%)  9 (12.7%) | 40 (58.0%)  13 (18.8%)  16 (23.2%) | **0.003** | 48 (32.9%)  70 (47.9%)  28 (19.2%) | 22 (27.8%)  50 (63.3%)  7 (8.9%) | 26 (38.8%)  20 (29.9%)  21 (31.3%) | **<0.001** |
| **Breakfast foods** |  |  |  |  |  |  |  |  |  |  |  |  |
| Every day or ≥ 5-6 times/week  3-4 times/week  1-2 times/week  ≤1-3 times/month or not consumed | 59 (20.6%)  98 (34.3%)  97 (33.9%)  32 (11.2%) | 39 (26.0%)  40 (26.7%)  53 (35.3%)  18 (12.0%) | 20 (14.7%)  58 (42.6%)  44 (32.4%)  14 (10.3%) | **0.018** | 29 (20.7%)  53 (37.9%)  46 (32.9%)  12 (8.6%) | 22 (31.0%)  17 (23.9%)  25 (35.2%)  7 (9.9%) | 7 (10.1%)  36 (52.2%)  21 (30.4%)  5 (7.2%) | **0.002** | 30 (20.5%)  45 (30.8%)  51 (34.9%)  20 (13.7%) | 17 (21.5%)  23 (29.1%)  28 (35.4%)  11 (13.9%) | 13 (19.4%)  22 (32.8%)  23 (34.3%)  9 (13.4%) | 0.967 |
| **Eating out of home or in parties** |  |  |  |  |  |  |  |  |  |  |  |  |
| 3-4 times/week  1-2 times/week  ≤1-3 times/month or not eaten outside | 62 (21.7%)  59 (20.6%)  165 (57.7%) | 35 (23.3%)  33 (22.0%)  82 (54.7%) | 27 (19.9%)  26 (19.1%)  83 (61.0%) | 0.553 | 28 (20.0%)  36 (25.7%)  76 (54.3%) | 18 (25.4%)  18 (25.4%)  35 (49.3%) | 10 (14.5%)  18 (26.1%)  41 (59.4%) | 0.255 | 34 (23.3%)  23 (15.8%)  89 (61.0%) | 17 25.4%)  8 (11.9%)  42 (62.7%) | 17 (25.4%)  8 (11.9%)  42 (62.7%) | 0.488 |
| **Pulses (DAL)** |  |  |  |  |  |  |  |  |  |  |  |  |
| Every day or ≥ 5-6 times/week  3-4 times/week  1-2 times/week | 178 (62.2%)  81 (28.3%)  27 (9.4%) | 86 (57.3%)  48 (32.0%)  16 (10.7%) | 92 (67.6%)  33 (24.3%)  11 (8.1%) | 0.199 | 82 (58.6%)  47 (33.6%)  11 (7.9%) | 35 (49.3%)  30 (42.3%)  6 (8.5%) | 47 (68.1%)  17 (24.6%)  5 (7.2%) | 0.067 | 96 (65.8%)  34 (23.3%)  16 (11.0%) | 51 (64.6%)  18 (22.8%)  10 (12.7%) | 45 (67.2%)  16 (23.9%)  6 (9.0%) | 0.775 |
| **Vegetables** |  |  |  |  |  |  |  |  |  |  |  |  |
| Every day or ≥ 5-6 times/week  3-4 times/week  1-2 times/week | 202 (70.6%)  60 (21.0%)  24 (8.4%) | 105 (70.0%)  32 (21.3%)  13 (8.7%) | 97 (71.3%)  28 (20.6%)  11 (8.1%) | 0.968 | 97 (69.3%)  27 (19.3%)  16 (11.4%) | 48 (67.6%)  13 (18.3%)  10 (14.1%) | 49 (71.0%)  14 (20.3%)  6 (8.7%) | 0.601 | 105 (71.9%)  33 (22.6%)  8 (5.5%) | 57 (72.2%)  19 (24.1%)  3 (3.8%) | 48 (71.6%)  14 (20.9%)  5 (7.5%) | 0.592 |
| **Tuberous roots** |  |  |  |  |  |  |  |  |  |  |  |  |
| Every day or ≥ 5-6 times/week  3-4 times/week  1-2 times/week  ≤1-3 times/month or not consumed | 149 (52.1%)  44 (15.4%)  66 (23.1%)  27 (9.4%) | 84 (56.0%)  20 (13.3%)  31 (20.7%)  15 (10.0%) | 65 (47.8%)  24 (17.6%)  35 (25.7%)  12 (8.8%) | 0.443 | 77 (55.0%)  19 (13.6%)  32 (22.9%)  12 (8.6%) | 45 (63.4%)  7 (9.9%)  12 (16.9%)  7 (9.9%) | 32 (46.4%)  12 (17.4%)  20 (29.0%)  5 (7.2%) | 0.121 | 72 (49.3%)  25 (17.1%)  34 (23.3%)  15 (10.3%) | 39 (49.4%)  13 (16.5%)  19 (24.1%)  8 (10.1%) | 33 (49.3%)  12 (17.9%)  15 (22.4%)  7 (10.4%) | 0.993 |
| **Fresh fruits** |  |  |  |  |  |  |  |  |  |  |  |  |
| Every day or ≥ 5-6 times/week  3-4 times/week  1-2 times/week  ≤1-3 times/month or not consumed | 37 (12.9%)  58 (20.3%)  94 (32.9%)  97 (33.9%) | 19 (12.7%)  26 (17.3%)  49 (32.7%)  56 (37.3%) | 18 (13.2%)  32 (23.5%)  45 (33.1%)  41 (30.1%) | 0.483 | 22 (15.7%)  26 (18.6%)  47 (33.6%)  45 (32.1%) | 12 (16.9%)  9 (12.7%)  23 (32.4%)  27 (38.0%) | 10 (14.5%)  17 (24.6%)  24 (34.8%)  18 (26.1%) | 0.218 | 15 (10.3%)  32 (21.9%)  47 (32.2%)  52 (35.6%) | 7 (8.9%)  17 (21.5%)  26 (32.9%)  29 (36.7%) | 8 (11.9%)  15 (22.4%)  21 (31.3%)  23 (34.3%) | 0.933 |
| **Dry nuts or seeds** |  |  |  |  |  |  |  |  |  |  |  |  |
| Every day or ≥ 5-6 times/week  3-4 times/week  1-2 times/week  ≤1-3 times/month or not consumed | 34 (11.9%)  46 (16.1%)  90 (31.5%)  116 (40.6%) | 20 (13.3%)  20 (13.3%)  49 (32.7%)  61 (40.7%) | 14 (10.3%)  26 (19.1%)  41 (30.1%)  55 (40.4%) | 0.535 | 21 (15.0%)  20 (14.3%)  49 (35.0%)  50 (35.7%) | 11 (15.5%)  7 (9.9%)  27 (38.0%)  26 (36.6%) | 10 (14.5%)  13 (18.8%)  22 (31.9%)  24 (34.8%) | 0.492 | 13 (8.9%)  26 (17.8%)  41 (28.1%)  66 (45.2%) | 9 (11.4%)  13 (16.5%)  22 (27.8%)  35 (44.3%) | 4 (6.0%)  13 (19.4%)  19 (28.4%)  31 (46.3%) | 0.704 |
| **Milk, Curd, Yogurt** |  |  |  |  |  |  |  |  |  |  |  |  |
| Every day or ≥ 5-6 times/week  3-4 times/week  1-2 times/week  ≤1-3 times/month or not consumed | 39 (13.6%)  74 (25.9%)  41 (14.3%)  132 (46.2%) | 24 (16.0%)  37 (24.7%)  24 (16.0%)  65 (43.3%) | 15 (11.0%)  37 (27.2%)  17 (12.5%)  67 (49.3%) | 0.453 | 24 (17.1%)  38 (27.1%)  20 (14.3%)  58 (41.4%) | 15 (21.1%)  17 (23.9%)  13 (18.3%)  26 (36.6%) | 9 (13.0%)  21 30.4%)  7 (10.1%)  32 (46.4%) | 0.229 | 15 (10.3%)  36 (24.7%)  21 (14.4%)  74 (50.7%) | 9 (11.4%)  20 (25.3%)  11 (13.9%)  39 (49.4%) | 6 (9.0%)  16 (23.9%)  10 (14.9%)  35 (52.2%) | 0.955 |
| **Type of Milk, Curd, or Yogurt** |  |  |  |  |  |  |  |  |  |  |  |  |
| I ate whole milk or full-fat curd  I ate fat-removed milk or curd  Not eaten milk or curd | 149 (52.1%)  110 (38.5%)  27 (9.4%) | 84 (56.0%)  51 (34.0%)  15 (10.0%) | 65 (47.8%)  59 (43.4%)  12 (8.8%) | 0.265 | 77 (55.0%)  51 (36.4%)  12 (8.6%) | 45 (63.4%)  19 (26.8%)  7 (9.9%) | 32 (46.4%)  32 (46.4%)  5 (7.2%) | 0.055 | 72 (49.3%)  59 (40.4%)  15 (10.3%) | 39 (49.4%)  32 (40.5%)  8 (10.1%) | 33 (49.3%)  27 (40.3%)  7 (10.4%) | 0.998 |
| **Ghee, butter** |  |  |  |  |  |  |  |  |  |  |  |  |
| Every day or ≥ 5-6 times/week  3-4 times/week  1-2 times/week  ≤1-3 times/month or not consumed | 20 (7.0%)  28 (9.8%)  49 (17.1%)  189 (66.1%) | 7 (4.7%)  17 (11.3%)  31 (20.7%)  95 (63.3%) | 13 (9.6%)  11 (8.1%)  18 (13.2%)  94 (69.1%) | 0.118 | 8 (5.7%)  14 (10.0%)  26 (18.6%)  92 (65.7%) | 4 (5.6%)  8 (11.3%)  15 (21.1%)  44 (62.0%) | 4 (5.8%)  6 (8.7%)  11 (15.9%)  48 (69.6%) | 0.790 | 12 (8.2%)  14 (9.6%)  23 (15.8%)  97 (66.4%) | 3 (3.8%)  9 (11.4%)  16 (20.3%)  51 (64.6%) | 9 (13.4%)  5 (7.5%)  7 (10.4%)  46 (68.7%) | 0.072 |
| **Other dairy products** |  |  |  |  |  |  |  |  |  |  |  |  |
| Every day or ≥ 5-6 times/week  3-4 times/week  1-2 times/week  ≤1-3 times/month or not consumed | 29 (10.1%)  32 (11.2%)  60 (21.0%)  165 (57.7%) | 14 (9.3%)  12 (8.0%)  33 (22.0%)  91 (60.7%) | 15 (11.0%)  20 (14.7%)  27 (19.9%)  74 (54.4%) | 0.295 | 13 (9.3%)  15 (10.7%)  31 (22.1%)  81 (57.9%) | 6 (8.5%)  4 (5.6%)  19 (26.8%)  42 (59.2%) | 7 (10.1%)  11 (15.9%)  12 (17.4%)  39 (56.5%) | 0.171 | 16 (11.0%)  17 (11.6%)  29 (19.9%)  84 (57.5%) | 8 (10.1%)  8 (10.1%)  14 (17.7%)  49 (62.0%) | 8 (11.9%)  9 (13.4%)  15 (22.4%)  35 (52.2%) | 0.694 |
| **Cream-containing food items** |  |  |  |  |  |  |  |  |  |  |  |  |
| Every day or ≥ 5-6 times/week  3-4 times/week  1-2 times/week  ≤1-3 times/month or not consumed | 40 (14.0%)  31 (10.8%)  99 (34.6%)  116 (40.6%) | 22 (14.7%)  21 (14.0%)  46 (30.7%)  61 (40.7%) | 18 (13.2%)  10 (7.4%)  53 (39.0%)  55 (40.4%) | 0.218 | 21 (15.0%)  21 (15.0%)  47 (33.6%)  51 (36.4%) | 11 (15.5%)  15 (21.1%)  20 (28.2%)  25 (35.2%) | 10 (14.5%)  6 (8.7%)  27 (39.1%)  26 (37.7%) | 0.176 | 19 (13.0%)  10 (6.8%)  52 (35.6%)  65 (44.5%) | 11 (13.9%)  6 (7.6%)  26 (32.9%)  36 (45.6%) | 8 (11.9%)  4 (6.0%)  26 (38.8%)  29 (43.3%) | 0.886 |
| **Fast food items** |  |  |  |  |  |  |  |  |  |  |  |  |
| Every day or ≥ 5-6 times/week  3-4 times/week  1-2 times/week  ≤1-3 times/month or not eaten | 16 (5.6%)  19 (6.6%)  58 (20.3%)  193 (67.5%) | 9 (6.0%)  12 (8.0%)  33 (22.0%)  96 (64.0%) | 7 (5.1%)  7 (5.1%)  25 (18.4%)  97 (71.3%) | 0.574 | 9 (6.4%)  13 (9.3%)  32 (22.9%)  86 (61.4%) | 7 (9.9%)  10 (14.1%)  16 (22.5%)  38 (53.5%) | 2 (2.9%)  3 (4.3%)  16 (23.2%)  48 (69.6%) | 0.053 | 7 (4.8%)  6 (4.1%)  26 (17.8%)  107 (73.3%) | 2 (2.5%)  2 (2.5%)  17 (21.5%)  58 (73.4%) | 5 (7.5%)  4 (6.0%)  9 (13.4%)  49 (73.1%) | 0.239 |
| **Fried foods** |  |  |  |  |  |  |  |  |  |  |  |  |
| Every day or ≥ 5-6 times/week  3-4 times/week  1-2 times/week  ≤1-3 times/month or not ate | 42 (14.7%)  59 (20.6%)  79 (27.6%)  106 (37.1%) | 25 (16.7%)  33 (22.0%)  45 (30.0%)  47 (31.3%) | 17 (12.5%)  26 (19.1%)  34 (25.0%)  59 (43.4%) | 0.206 | 20 (14.3%)  32 (22.9%)  38 (27.1%)  50 (35.7%) | 14 (19.7%)  16 (22.5%)  20 (28.2%)  21 (29.6%) | 6 (8.7%)  16 (23.2%)  18 (26.1%)  29 (42.0%) | 0.207 | 22 (15.1%)  27 (18.5%)  41 (28.1%)  56 (38.4%) | 11 (13.9%)  17 (21.5%)  25 (31.6%)  26 (32.9%) | 11 (16.4%)  10 (14.9%)  16 (23.9%)  30 (44.8%) | 0.375 |
| **Cookies** |  |  |  |  |  |  |  |  |  |  |  |  |
| Every day or ≥ 5-6 times/week  3-4 times/week  1-2 times/week  ≤1-3 times/month or not ate | 59 (20.6%)  87 (30.4%)  55 (19.2%)  85 (29.7%) | 24 (16.0%)  50 (33.3%)  33 (22.0%)  43 (28.7%) | 35 (25.7%)  37 (27.2%)  22 (16.2%)  42 (30.9%) | 0.137 | 29 (20.7%)  38 (27.1%)  30 (21.4%)  43 (30.7%) | 11 (15.5%)  20 (28.2%)  17 (23.9%)  23 (32.4%) | 18 (26.1%)  18 (26.1%)  13 (18.8%)  20 (29.0%) | 0.474 | 30 (20.5%)  49 (33.6%)  25 (17.1%)  42 (28.8%) | 13 (16.5%)  30 (38.0%)  16 (20.3%)  20 (25.3) | 17 (25.4%)  19 (28.4%)  9 (13.4%)  22 (32.8%) | 0.251 |
| **High-salty foods** |  |  |  |  |  |  |  |  |  |  |  |  |
| Every day or ≥ 5-6 times/week  3-4 times/week  1-2 times/week  ≤1-3 times/month or not consume | 23 (8.0%)  92 (32.2%)  60 (21.0%)  111 (38.8%) | 16 (10.7%)  60 (40.0%)  26 (17.3%)  48 (32.0%) | 7 (5.1%)  32 (23.5%)  34 (25.0%)  63 (46.3%) | **0.002** | 11 (7.9%)  45 (32.1%)  27 (19.3%)  57 (40.7%) | 9 (12.7%)  29 (40.8%)  10 (14.1%)  23 (32.4%) | 2 (2.9%)  16 (23.2%)  17 (24.6%)  34 (49.3%) | **0.007** | 12 (8.2%)  47 (32.2%)  33 (22.6%)  54 (37.0%) | 7 (8.9%)  31 (39.2%)  16 (20.3%)  25 (31.6%) | 5 (7.5%)  16 (23.9%)  17 (25.4%)  29 (43.3%) | 0.213 |
| **Tea, Coffee** |  |  |  |  |  |  |  |  |  |  |  |  |
| Every day or ≥ 5-6 times/week  3-4 times/week  1-2 times/week  ≤1-3 times/month or not drink | 181 (63.3%)  37 (12.9%)  19 (6.6%)  49 (17.1%) | 96 (64.0%)  20 (13.3%)  7 (4.7%)  27 (18.0%) | 85 (62.5%)  17 (12.5%)  12 (8.8%)  22 (16.2%) | 0.561 | 95 (67.9%)  19 (13.6%)  7 (5.0%)  19 (13.6%) | 48 (67.6%)  11 (15.5%)  1 (1.4%)  11 (15.5%) | 47 (68.1%)  8 (11.6%)  6 (8.7%)  8 (11.6%) | 0.212 | 86 (58.9%)  18 (12.3%)  12 (8.2%)  30 (20.5%) | 48 (60.8%)  9 (11.4%)  6 (7.6%)  16 (20.3%) | 38 (56.7%)  9 (13.4%)  6 (9.0%)  14 (20.9%) | 0.958 |
| **Carbonated beverages** |  |  |  |  |  |  |  |  |  |  |  |  |
| Every day or ≥ 5-6 times/week  3-4 times/week  1-2 times/week  ≤1-3 times/month or not drink | 14 (4.9%)  24 (8.4%)  54 (18.9%)  194 (67.8%) | 8 (5.3%)  15 (10.0%)  32 (21.3%)  95 (63.3%) | 6 (4.4%)  9 (6.6%)  22 (16.2%)  99 (72.8%) | 0.385 | 10 (7.1%)  16 (11.4%)  26 (18.6%)  88 (62.9%) | 7 (9.9%)  10 (14.1%)  14 (19.7%)  40 (56.3%) | 3 (4.3%)  6 (8.7%)  12 (17.4%)  48 (69.6%) | 0.327 | 4 (2.7%)  8 (5.5%)  28 (19.2%)  106 (72.6%) | 1 (1.3%)  5 (6.3%)  18 (22.8%)  55 (69.6%) | 3 (4.5%)  3 (4.5%)  10 (14.9%)  51 (76.1%) | 0.396 |
| **Sweets, Desserts** |  |  |  |  |  |  |  |  |  |  |  |  |
| Every day or ≥ 5-6 times/week  3-4 times/week  1-2 times/week  ≤1-3 times/month or not ate | 32 (11.2%)  55 (19.2%)  70 (24.5%)  129 (45.1%) | 18 (12.0%)  36 (24.0%)  38 (25.3%)  58 (38.7%) | 14 (10.3%)  19 (14.0%)  32 (23.5%)  71 (52.2%) | 0.075 | 13 (9.3%)  29 (20.7%)  36 (25.7%)  62 (44.3%) | 9 (12.7%)  17 (23.9%)  17 (23.9%)  28 (39.4%) | 4 (5.8%)  12 (17.4%)  19 (27.5%)  34 (49.3%) | 0.327 | 19 (13.0%)  26 (17.8%)  34 (23.3%)  67 (45.9%) | 9 (11.4%)  19 (24.1%)  21 (26.6%)  30 (38.0%) | 10 (14.9%)  7 (10.4%)  13 (19.4%)  37 (55.2%) | 0.064 |
| **Animal meat** |  |  |  |  |  |  |  |  |  |  |  |  |
| Every day or ≥ 5-6 times/week  3-4 times/week  1-2 times/week  ≤1-3 times/month/ not eaten/vegetarians | 8 (2.8%)  49 (17.1%)  78 (27.3%)  151 (52.8%) | 4 (2.7%)  19 (12.7%)  39 (26.0%)  88 (58.7%) | 4 (2.9%)  30 (22.1%)  39 (28.7%)  63 (46.3%) | 0.115 | 4 (2.9%)  31 (22.1%)  25 (17.9%)  80 (57.1%) | 2 (2.8%)  14 (19.7%)  11 (15.5%)  44 (62.0%) | 2 (2.9%)  17 (24.6%)  14 (20.3%)  36 (52.2%) | 0.700 | 4 (2.7%)  18 (12.3%)  53 (36.3%)  71 (48.6%) | 2 (2.5%)  5 (6.3%)  28 (35.4%)  44 (55.7%) | 2 (3.0%)  13 (19.4%)  25 (37.3%)  27 (40.3%) | 0.077 |
| **Removal of skin or visible fat from animal meats** | |  |  |  |  |  |  |  |  |  |  |  |
| Did not remove skin and visible fat  Removed all skin and visible fat  Not ate animal meat/vegetarians | 146 (51.0%)  62 (21.7%)  78 (27.3%) | 83 (55.3%)  28 (18.7%)  39 (26.0%) | 63 (46.3%)  34 (25.0%)  39 (28.7%) | 0.267 | 69 (49.3%)  46 (32.9%)  25 (17.9%) | 41 (57.7%)  19 (26.8%)  11 (15.5%) | 28 (40.6%)  27 (39.1%)  14 (20.3%) | 0.124 | 77 (52.7%)  16 (11.0%)  53 (36.3%) | 42 (53.2%)  9 (11.4%)  28 (35.4%) | 35 (52.2%)  7 (10.4%)  25 (37.3%) | 0.965 |
| **Chicken meat** |  |  |  |  |  |  |  |  |  |  |  |  |
| Every day or ≥ 5-6 times/week  3-4 times/week  1-2 times/week  ≤1-3 times/month/ not eaten/vegetarians | 18 (6.3%)  66 (23.1%)  84 (29.4%)  118 (41.3%) | 11 (7.3%)  30 (20.0%)  48 (32.0%)  61 (40.7%) | 7 (5.1%)  36 (26.5%)  36 (26.5%)  57 (41.9%) | 0.457 | 6 (4.3%)  38 (27.1%)  28 (20.0%)  68 (48.6%) | 4 (5.6%)  20 (28.2%)  14 (19.7%)  33 (46.5%) | 2 (2.9%)  18 (26.1%)  14 (20.3%)  35 (50.7%) | 0.849 | 12 (8.2%)  28 (19.2%)  56 (38.4%)  50 (34.2%) | 7 (8.9%)  10 (12.7%)  34 (43.0%)  28 (35.4%) | 5 (7.5%)  18 (26.9%)  22 (32.8%)  22 (32.8%) | 0.175 |
| **Removal of skin or visible fats from chicken** | |  |  |  |  |  |  |  |  |  |  |  |
| Did not remove skin and visible fat  Removed all skin and visible fat  Not ate chicken/vegetarians | 169 (59.1%)  33 (11.5%)  84 (29.4%) | 89 (59.3%)  13 (8.7%)  48 (32.0%) | 80 (58.8%)  20 (14.7%)  36 (26.5%) | 0.223 | 95 (67.9%)  17 (12.1%)  28 (20.0%) | 52 (73.2%)  5 (7.0%)  14 (19.7%) | 43 (62.3%)  12 (17.4%)  14 (20.3%) | 0.157 | 74 (50.7%)  16 (11.0%)  56 (38.4%) | 37 (46.8%)  8 (10.1%)  34 (43.0%) | 37 (55.2%)  8 (11.9%)  22 (32.8%) | 0.450 |
| **Roast meat or chicken** |  |  |  |  |  |  |  |  |  |  |  |  |
| Every day or ≥ 5-6 times/week  3-4 times/week  1-2 times/week  ≤1-3 times/month/ not eaten/vegetarians | 17 (5.9%)  59 (20.6%)  59 (20.6%)  151 (52.8%) | 9 (6.0%)  34 (22.7%)  28 (18.7%)  79 (52.7%) | 8 (5.9%)  25 (18.4%)  31 (22.8%)  72 (52.9%) | 0.747 | 8 (5.7%)  29 (20.7%)  36 (25.7%)  67 (47.9%) | 4 (5.6%)  18 (25.4%)  16 (22.5%)  33 (46.5%) | 4 (5.8%)  11 (15.9%)  20 (29.0%)  34 (49.3%) | 0.548 | 9 (6.2%)  30 (20.5%)  23 (15.8%)  84 (57.5%) | 5 (6.3%)  16 (20.3%)  12 (15.2%)  46 (58.2%) | 4 (6.0%)  14 (20.9%)  11 (16.4%)  38 (56.7%) | 0.996 |
| **Fishes** |  |  |  |  |  |  |  |  |  |  |  |  |
| Every day or ≥ 5-6 times/week  3-4 times/week  1-2 times/week  ≤1-3 times/month/ not eaten/vegetarians | 19 (6.6%)  36 (12.6%)  58 (20.3%)  173 (60.5%) | 10 (6.7%)  17 (11.3%)  30 (20.0%)  93 (62.0%) | 9 (6.6%)  19 (14.0%)  28 (20.6%)  80 (58.8%) | 0.913 | 6 (4.3%)  21 (15.0%)  33 (23.6%)  80 (57.1%) | 1 (1.4%)  8 (11.3%)  21 (29.6%)  41 (57.7%) | 5 (7.2%)  13 (18.8%)  12 (17.4%)  39 (56.5%) | 0.096 | 13 (8.9%)  15 (10.3%)  25 (17.1%)  93 (63.7%) | 9 (11.4%)  9 (11.4%)  9 (11.4%)  52 (65.8%) | 4 (6.0%)  6 (9.0%)  16 (23.9%)  41 (61.2%) | 0.185 |
| **Fish Fried** |  |  |  |  |  |  |  |  |  |  |  |  |
| Mainly ate fried fish  Mainly ate boiled fish  Not ate fish/vegetarians | 67 (23.4%)  86 (30.1%)  133 (46.5%) | 37 (24.7%)  43 (28.7%)  70 (46.7%) | 30 (22.1%)  43 (31.6%)  63 (46.3%) | 0.812 | 34 (24.3%)  48 (34.3%)  58 (41.4%) | 15 (21.1%)  27 (38.0%)  29 (40.8%) | 19 (27.5%)  21 (30.4%)  29 (42.0%) | 0.551 | 33 (22.6%)  38 (26.0%)  75 (51.4%) | 22 (27.8%)  16 (20.3%)  41 (51.9%) | 11 (16.4%)  22 (32.8%)  34 (50.7%) | 0.116 |
| **Whole egg** |  |  |  |  |  |  |  |  |  |  |  |  |
| Every day or ≥ 5-6 times/week  3-4 times/week  1-2 times/week  ≤1-3 times/month/ not eaten/vegetarians | 20 (7.0%)  19 (6.6%)  87 (30.4%)  160 (55.9%) | 8 (5.3%)  12 (8.0%)  43 (28.7%)  87 (58.0%) | 12 (8.8%)  7 (5.1%)  44 (32.4%)  73 (53.7%) | 0.445 | 12 (8.6%)  11 (7.9%)  49 (35.0%)  68 (48.6%) | 6 (8.5%)  7 (9.9%)  25 (35.2%)  33 (46.5%) | 6 (8.7%)  4 (5.8%)  24 (34.8%)  35 (50.7%) | 0.833 | 8 (5.5%)  8 (5.5%)  38 (26.0%)  92 (63.0%) | 2 (2.5%)  5 (6.3%)  18 (22.8%)  54 (68.4%) | 6 (9.0%)  3 (4.5%)  20 (29.9%)  38 (56.7%) | 0.218 |
| **Miscellaneous addition** |  |  |  |  |  |  |  |  |  |  |  |  |
| Every day or ≥ 5-6 times/week  3-4 times/week  1-2 times/week  ≤1-3 times/month/ not eaten | 29 (10.1%)  42 (14.7%)  78 (27.3%)  137 (47.9%) | 17 (11.3%)  23 (15.3%)  44 (29.3%)  66 (44.0%) | 12 (8.8%)  19 (14.0%)  34 (25.0%)  71 (52.2%) | 0.567 | 20 (14.3%)  24 (17.1%)  38 (27.1%)  58 (41.4%) | 12 (16.9%)  11 (15.5%)  23 (32.4%)  25 (35.2%) | 8 (11.6%)  13 (18.8%)  15 (21.7%)  33 (47.8%) | 0.293 | 9 (6.2%)  18 (12.3%)  40 (27.4%)  79 (54.1%) | 5 (6.3%)  12 (15.2%)  21 (26.6%)  41 (51.9%) | 4 (6.0%)  6 (9.0%)  19 (28.4%)  38 (56.7%) | 0.718 |
| Note: None of the patients ate outside the home daily, and all consumed vegetables and pulses. | | | | | | | | | | | | |
